# Supplementary material
Source: PubMed Central journal article supplement (PMC3518489)
Supplement: NIHMS370153-supplement-1_si_001.pdf [file NIHMS370153-supplement-1_si_001.pdf]

# On-Line Supporting Information

## ***In Vivo* Quantitative Study of Sized-Dependent Transport and Toxicity of Single Silver Nanoparticles Using Zebrafish Embryos**

Kerry J. Lee, Lauren M. Browning, Prakash D. Nallathamby, Tanvi Desai, and X. Nancy Xu\*

*Department of Chemistry and Biochemistry, Old Dominion University, Norfolk, VA 23529*

### **The On-Line Supporting Information (SI) includes:**

#### Three Real-Time Videos

**Videos S1-3:** Real-time tracking of diffusion of individual Ag NPs into/in zebrafish embryos: **(A)** near or in chorion pore channels of chorionic layers (CL), **(B)** in the chorionic space (CS), and **(C)** in inner mass of the embryo (IME), respectively. See Fig. 2 in main text.

---

\* To whom correspondence should be addressed: Email: [xhxu@odu.edu](mailto:xhxu@odu.edu); [www.odu.edu/sci/xu/xu.htm](http://www.odu.edu/sci/xu/xu.htm); Tel/fax: (757) 683-5698
